# Supplementary material for: Chemical interactions in the atomic layer deposition of Ge–Sb–Se–Te films and their ovonic threshold switching behavior
Source: Royal Society of Chemistry journal article supplement (doi:10.1039/c8tc01041b), 2018-01-01
Supplement: c8tc01041b1.pdf [file c8tc01041b1.pdf]

## SUPPORTING INFORMATION

### Chemical Interactions in the Atomic Layer Deposition of Ge-Sb-Se-Te Films and Their Ovonic Threshold Switching Behavior

*Sijung Yoo, Chanyoung Yoo, Eui-Sang Park, Woohyun Kim, Yoon Kyeong Lee\*, Cheol Seong  
Hwang\**

Department of Materials Science and Engineering, and Inter-University Semiconductor Research Center, Seoul  
National University, Seoul 08826, Republic of Korea

**Table S1.** ALD subcycle sequences and Ge-Sb-Se-Te atomic compositions of the deposited films

| GTST<br>(GeTe <sub>2</sub> -<br>Sb <sub>2</sub> Te <sub>3</sub> )                                        | Subcycle<br>sequences | Composition |         |         |         | d <sub>DUT</sub><br>(nm) |
|----------------------------------------------------------------------------------------------------------|-----------------------|-------------|---------|---------|---------|--------------------------|
|                                                                                                          |                       | Ge(at%)     | Sb(at%) | Se(at%) | Te(at%) |                          |
| GTST<br>(GeTe <sub>2</sub> -<br>Sb <sub>2</sub> Te <sub>3</sub> )                                        | GT1 ST0               | 33.78       |         |         | 66.22   | 17.9                     |
|                                                                                                          | GT8 ST1               | 26.50       | 8.41    | -       | 65.10   | 34.4                     |
|                                                                                                          | GT4 ST1               | 19.48       | 18.09   | -       | 62.43   | -                        |
|                                                                                                          | GT4 ST2               | 15.41       | 22.35   |         | 62.24   | 31.5                     |
| GTSS<br>(GeTe <sub>2</sub> -<br>Sb <sub>2</sub> Se <sub>3</sub> )                                        | GT1 SS1               | 1.99        | 35.59   | 27.16   | 35.26   | -                        |
|                                                                                                          | GT4 SS1               | 15.24       | 22.03   | 7.81    | 54.92   | -                        |
|                                                                                                          | GT1 SS2               | 1.02        | 35.96   | 39.95   | 23.07   | -                        |
|                                                                                                          | GT1 SS4               | 0.84        | 35.98   | 47.61   | 15.57   | -                        |
|                                                                                                          | GT4 SS2               | 13.15       | 24.83   | 13.38   | 48.64   | 34.4                     |
|                                                                                                          | GT6 SS2               | 25.35       | 11.88   | 13.47   | 49.30   | -                        |
|                                                                                                          | GT6 SS4               | 13.84       | 22.63   | 31.22   | 32.32   | 42.3                     |
| GT8 SS2                                                                                                  | 31.69                 | 3.94        | 7.15    | 57.22   | -       |                          |
| GTSTSS<br>(GeTe <sub>2</sub> -<br>Sb <sub>2</sub> Te <sub>3</sub> -<br>Sb <sub>2</sub> Se <sub>3</sub> ) | GT2 ST1 SS1           | 16.27       | 21.42   | 12.14   | 62.31   | -                        |
